# Supplementary material for: Global Reprogramming of Transcription in Chinese Fir (Cunninghamia lanceolata) during Progressive Drought Stress and after Rewatering
Source: MDPI journal article supplement (doi:10.3390/ijms160715194), 2015-07-06
Supplement: s1 [file s1]

# Supplementary Information

**Table S1.** Overview of the sequencing and assembly.

| Sample ID | Raw Bases (G) | Q20 Value (%) | Raw Reads  | Quality Trimmed | Adaptor Trimmed | Number Clean Reads | rRNA Trimmed | Clean Ratio |
|-----------|---------------|---------------|------------|-----------------|-----------------|--------------------|--------------|-------------|
| CK        | 5.7           | 97.5          | 56,930,846 | 56,407,568      | 55,809,822      | 54,764,610         | 53,697,348   | 94.30%      |
| C         | 8.7           | 97.5          | 86,707,968 | 85,720,076      | 84,841,030      | 83,117,122         | 76,853,198   | 88.60%      |
| D         | 6.6           | 97.5          | 65,985,062 | 65,338,791      | 64,654,791      | 63,442,220         | 60,907,814   | 92.30%      |
| E         | 8.8           | 96.6          | 87,715,970 | 87,600,546      | 87,513,980      | 87,322,067         | 79,741,790   | 90.91%      |
| F         | 7.4           | 97.1          | 74,048,140 | 73,936,606      | 73,867,663      | 73,699,083         | 67,316,490   | 90.90%      |

Q20 = bases of Q ≥ 20/all bases of sequencing; Clean ratio = rRNA trimmed/raw reads.

**Table S2.** Summary of the Chinese fir (*Cunninghamia lanceolata*) transcriptome.

| Statistics      | Counts  | Total Length (bp) | N25 (bp) | N50 (bp) | N75 (bp) | Average Length | Longest (bp) | N%  | GC%  |
|-----------------|---------|-------------------|----------|----------|----------|----------------|--------------|-----|------|
| contigs         | 120,924 | 74,108,516        | 1946     | 850      | 387      | 613            | 19,035       | 0.3 | 39.4 |
| Primary UniGene | 77,229  | 65,646,361        | 2396     | 1252     | 538      | 850            | 26,392       | 0.3 | 39.4 |
| Final UniGene   | 75,412  | 65,290,699        | 2430     | 1289     | 552      | 867            | 26,392       | 0.4 | 39.4 |

**Table S3.** Annotation of unigene sequences in Chinese fir (*Cunninghamia lanceolata*).

| Sequence Database | Number of Annotated Unigene Sequences | Percentage of Annotated Unigene Sequences |
|-------------------|---------------------------------------|-------------------------------------------|
| Total unigenes    | 75,421                                | 100                                       |
| Swiss-Prot        | 27,634                                | 36.64                                     |
| COG               | 15,662                                | 20.77                                     |
| GO                | 16,894                                | 22.40                                     |
| KEGG              | 5887                                  | 7.81                                      |

Swiss-Prot, Swiss-Prot protein database; COG, clusters of orthologous groups; GO, gene ontology; KEGG, Kyoto Encyclopedia of Genes and Genomes Pathway.

**Table S4.** Top 50 categories of Chinese fir unigenes enriched into KEGG pathways.

| KEGG Categories                              | Mapped-KO | Unigene-NUM | Rate of No. | Pathway-ID |
|----------------------------------------------|-----------|-------------|-------------|------------|
| Metabolic pathways                           | 823       | 2193        | 37.25       | ko01100    |
| Biosynthesis of secondary metabolites        | 345       | 1211        | 20.57       | ko01110    |
| Microbial metabolism in diverse environments | 131       | 438         | 7.44        | ko01120    |
| Cell cycle                                   | 60        | 324         | 5.50        | ko04110    |
| Ribosome                                     | 113       | 280         | 4.76        | ko03010    |
| Biosynthesis of amino acids                  | 102       | 272         | 4.62        | ko01230    |
| Pyrimidine metabolism                        | 73        | 272         | 4.62        | ko00240    |
| Carbon metabolism                            | 88        | 265         | 4.50        | ko01200    |
| Spliceosome                                  | 98        | 239         | 4.06        | ko03040    |
| Starch and sucrose metabolism                | 35        | 219         | 3.72        | ko00500    |
| Plant-pathogen interaction                   | 34        | 206         | 3.50        | ko04626    |
| Carbon fixation in photosynthetic organisms  | 26        | 204         | 3.47        | ko00710    |
| Plant hormone signal transduction            | 37        | 200         | 3.40        | ko04075    |

**Table S4. Cont.**

| <b>KEGG Categories</b>                                | <b>Mapped-KO</b> | <b>Unigene-NUM</b> | <b>Rate of No.</b> | <b>Pathway-ID</b> |
|-------------------------------------------------------|------------------|--------------------|--------------------|-------------------|
| Protein processing in endoplasmic reticulum           | 75               | 196                | 3.33               | ko04141           |
| RNA transport                                         | 93               | 195                | 3.31               | ko03013           |
| Epstein-Barr virus infection                          | 63               | 185                | 3.14               | ko05169           |
| Phenylpropanoid biosynthesis                          | 15               | 184                | 3.13               | ko00940           |
| Purine metabolism                                     | 86               | 174                | 2.96               | ko00230           |
| Herpes simplex infection                              | 30               | 163                | 2.77               | ko05168           |
| Glycolysis/Gluconeogenesis                            | 34               | 156                | 2.65               | ko00010           |
| Viral carcinogenesis                                  | 42               | 155                | 2.63               | ko05203           |
| HTLV-I infection                                      | 48               | 152                | 2.58               | ko05166           |
| Oxidative phosphorylation                             | 77               | 147                | 2.50               | ko00190           |
| Endocytosis                                           | 39               | 139                | 2.36               | ko04144           |
| Galactose metabolism                                  | 15               | 135                | 2.29               | ko00052           |
| Ubiquitin mediated proteolysis                        | 61               | 133                | 2.26               | ko04120           |
| mRNA surveillance pathway                             | 48               | 130                | 2.21               | ko03015           |
| Phenylalanine metabolism                              | 16               | 129                | 2.19               | ko00360           |
| Amino sugar and nucleotide sugar metabolism           | 42               | 127                | 2.16               | ko00520           |
| Citrate cycle (TCA cycle)                             | 23               | 124                | 2.11               | ko00020           |
| ErbB signaling pathway                                | 8                | 121                | 2.06               | ko04012           |
| RNA degradation                                       | 49               | 120                | 2.04               | ko03018           |
| Cell cycle—yeast                                      | 54               | 119                | 2.02               | ko04111           |
| Influenza A                                           | 20               | 119                | 2.02               | ko05164           |
| Nitrogen metabolism                                   | 14               | 117                | 1.99               | ko00910           |
| MicroRNAs in cancer                                   | 20               | 114                | 1.94               | ko05206           |
| Oocyte meiosis                                        | 32               | 114                | 1.94               | ko04114           |
| Phagosome                                             | 31               | 110                | 1.87               | ko04145           |
| Alcoholism                                            | 15               | 107                | 1.82               | ko05034           |
| Apoptosis                                             | 8                | 106                | 1.80               | ko04210           |
| Pyruvate metabolism                                   | 31               | 105                | 1.78               | ko00620           |
| Neurotrophin signaling pathway                        | 18               | 104                | 1.77               | ko04722           |
| Stilbenoid, diarylheptanoid and gingerol biosynthesis | 5                | 101                | 1.72               | ko00945           |
| Glutathione metabolism                                | 17               | 100                | 1.70               | ko00480           |
| Peroxisome                                            | 39               | 97                 | 1.65               | ko04146           |
| Cysteine and methionine metabolism                    | 32               | 97                 | 1.65               | ko00270           |
| Histidine metabolism                                  | 12               | 97                 | 1.65               | ko00340           |
| Non-alcoholic fatty liver disease (NAFLD)             | 42               | 94                 | 1.60               | ko04932           |
| Arginine and proline metabolism                       | 41               | 92                 | 1.56               | ko00330           |
| Insulin signaling pathway                             | 20               | 92                 | 1.56               | ko04910           |

**Table S5.** Transcript expression level of 52 differentially expressed genes.

| Category Annotation  | Genes ID        | Unigene_<br>Length | Description                                     | CK_RPKM  | C_RPKM   | D_RPKM   | E_RPKM   | F_RPKM      | <i>p</i> -Value        |
|----------------------|-----------------|--------------------|-------------------------------------------------|----------|----------|----------|----------|-------------|------------------------|
| Transcription factor | Contig11986     | 2123               | HSF transcription factor                        | 21.60193 | 26.90144 | 56.285   | 51.08365 | 15.44308404 | $2.06 \times 10^{-3}$  |
| Transcription factor | Contig12733     | 2920               | Transcription factor TEIL                       | 4.966853 | 6.165395 | 36.42678 | 31.83624 | 5.776346314 | $5.80 \times 10^{-6}$  |
| Transcription factor | Contig14078     | 626                | AP2/ERF domain-containing transcription factor  | 37.38483 | 32.90566 | 2.497829 | 6.278978 | 18.49667789 | $8.84 \times 10^{-8}$  |
| Transcription factor | Contig14547     | 1852               | R2R3-MYB transcription factor                   | 22.15254 | 7.506262 | 45.96736 | 3.297967 | 1.870712121 | $1.60 \times 10^{-7}$  |
| Transcription factor | Contig17654     | 3849               | WRKY transcription factor PmWRKY109             | 2.026752 | 1.923602 | 18.57196 | 24.45211 | 2.193448397 | $2.28 \times 10^{-4}$  |
| Transcription factor | Contig18232     | 799                | TM8-like MADS-box transcription factor          | 19.33431 | 19.30203 | 3.938155 | 5.468087 | 21.47519845 | $7.87 \times 10^{-4}$  |
| Transcription factor | Contig22662     | 1850               | Transcription factor WRKY                       | 2.898266 | 2.16713  | 14.04512 | 25.18801 | 3.262500651 | $7.65 \times 10^{-3}$  |
| Transcription factor | Contig2749      | 594                | AP2 transcription factor SIAP2e                 | 34.41541 | 40.8976  | 19.9239  | 14.71154 | 27.54689684 | $1.60 \times 10^{-3}$  |
| Transcription factor | Contig35532     | 1399               | BZIP transcription factor bZIP123               | 0.204195 | 0.252538 | 15.33022 | 13.9227  | 1.577110044 | $2.81 \times 10^{-4}$  |
| Transcription factor | Contig35910     | 360                | Transcription factor MYB5                       | 8.17942  | 2.304132 | 35.33743 | 25.89579 | 8.306837005 | $4.02 \times 10^{-8}$  |
| Transcription factor | Contig5207      | 2565               | WRKY transcription factor PmWRKY117             | 5.200218 | 6.28808  | 27.15383 | 35.22272 | 4.030788688 | $5.31 \times 10^{-4}$  |
| Transcription factor | Contig53553     | 945                | Ethylene-responsive transcription factor        | 0.790619 | 0.585176 | 17.87427 | 2.659547 | 1.96817044  | $7.85 \times 10^{-5}$  |
| Transcription factor | Contig8726      | 4407               | Squamosa promoter-binding transcription factor  | 5.649461 | 5.061039 | 26.19012 | 26.33616 | 6.107136804 | $3.39 \times 10^{-4}$  |
| Transcription factor | First_Contig436 | 1485               | Ethylene-responsive transcription factor 2      | 36.37271 | 22.62239 | 3.17187  | 6.956711 | 15.63134295 | $1.50 \times 10^{-4}$  |
| Signal transport     | Contig10704     | 501                | Putative phosphate transporter                  | 17.93931 | 23.7925  | 1.733911 | 9.653866 | 42.11045895 | $4.36 \times 10^{-6}$  |
| Signal transport     | Contig11618     | 1385               | Putative ammonium transporter                   | 17.23059 | 13.97452 | 46.42767 | 53.28912 | 10.71689494 | $3.03 \times 10^{-5}$  |
| Signal transport     | Contig13013     | 2425               | Phosphatidylinositol transporter, putative      | 10.21251 | 11.29421 | 60.89781 | 21.4089  | 10.88055703 | $6.05 \times 10^{-9}$  |
| Signal transport     | Contig14158     | 2533               | Sodium-dicarboxylate cotransporter              | 6.419729 | 13.72958 | 64.63442 | 49.126   | 13.70648502 | $6.66 \times 10^{-9}$  |
| Signal transport     | Contig1568      | 2563               | Inorganic phosphate transporter 2-1             | 30.5226  | 25.26185 | 1.48378  | 5.341976 | 14.16501359 | $1.22 \times 10^{-6}$  |
| Signal transport     | Contig21431     | 477                | ATP-binding cassette transporter                | 16.81491 | 22.09133 | 2.428202 | 7.872737 | 7.224998592 | $3.99 \times 10^{-5}$  |
| Signal transport     | Contig24464     | 1388               | Electron transport oxidoreductase, putative     | 5.84194  | 7.237764 | 34.42213 | 13.31717 | 6.016866194 | $4.51 \times 10^{-5}$  |
| Signal transport     | Contig2705      | 1889               | Zinc transporter                                | 18.53122 | 18.45908 | 36.39083 | 26.24599 | 15.39653775 | $2.30 \times 10^{-2}$  |
| Signal transport     | Contig4412      | 2521               | Sucrose transporter 5                           | 13.04004 | 8.451227 | 42.35287 | 22.10644 | 5.403088707 | $2.29 \times 10^{-6}$  |
| Signal transport     | Contig5065      | 2816               | Sulfate transporter                             | 17.82312 | 29.30896 | 0.178235 | 1.193455 | 3.53552843  | $1.05 \times 10^{-8}$  |
| Signal transport     | Contig540       | 3202               | Oligopeptide transporter OPT family protein     | 43.90794 | 49.34479 | 4.991844 | 10.80616 | 55.25594942 | $7.52 \times 10^{-11}$ |
| Signal transport     | Contig6928      | 685                | Carbohydrate transporter/sugar porter           | 14.37168 | 24.98105 | 402.063  | 176.2831 | 24.33044017 | $1.24 \times 10^{-86}$ |
| Signal transport     | Contig7998      | 3520               | Calmodulin-binding ion transporter-like protein | 1.179884 | 1.252436 | 28.63275 | 8.086438 | 1.517816601 | $4.98 \times 10^{-7}$  |

Table S5. *Cont.*

| Category Annotation    | Genes ID        | Unigene_<br>Length | Description                                                    | CK_RPKM  | C_RPKM   | D_RPKM   | E_RPKM   | F_RPKM      | p-Value                 |
|------------------------|-----------------|--------------------|----------------------------------------------------------------|----------|----------|----------|----------|-------------|-------------------------|
| Signal transport       | Contig8031      | 365                | Putative phosphate transporter                                 | 105.0565 | 154.8293 | 10.3661  | 29.46429 | 90.77294056 | $8.53 \times 10^{-5}$   |
| Signal transport       | First_Contig390 | 2623               | CMP-sialic acid transporter 2                                  | 7.749321 | 6.336437 | 21.40169 | 9.804498 | 4.463043082 | $8.32 \times 10^{-3}$   |
| Stress kinase          | Contig10014     | 2717               | Receptor protein kinase, putative                              | 16.41015 | 12.54538 | 67.8809  | 33.28448 | 12.08699705 | $5.07 \times 10^{-10}$  |
| Stress kinase          | Contig11111     | 3098               | Serine/threonine-protein kinase                                | 21.20141 | 29.97802 | 1.532871 | 7.801266 | 22.2133891  | $9.34 \times 10^{-8}$   |
| Stress kinase          | Contig11265     | 2794               | Calcium-dependent protein kinase, putative                     | 17.49943 | 21.88678 | 71.3095  | 131.3986 | 19.57894086 | $4.11 \times 10^{-7}$   |
| Stress kinase          | Contig20688     | 484                | Receptor protein kinase-like protein                           | 25.87913 | 29.76964 | 2.712162 | 2.535975 | 24.97827878 | $5.70 \times 10^{-7}$   |
| Stress kinase          | Contig23425     | 314                | Leucine-rich repeat protein kinase-like protein                | 13.01678 | 8.756681 | 1.229567 | 1.814872 | 5.16838313  | $3.60 \times 10^{-2}$   |
| Stress kinase          | Contig41353     | 346                | Receptor protein kinase CLAVATA1, putative                     | 1.778288 | 3.95121  | 17.40726 | 27.53484 | 5.638999038 | $4.43 \times 10^{-3}$   |
| Stress kinase          | Contig43089     | 3886               | Probable LRR receptor-like serine/<br>threonine-protein kinase | 0.169644 | 0.332042 | 8.459873 | 9.618531 | 0.821163419 | $2.16 \times 10^{-2}$   |
| Stress kinase          | Contig7698      | 471                | Receptor protein kinase-like protein                           | 41.19647 | 35.2224  | 19.71406 | 9.213964 | 16.84079896 | $3.16 \times 10^{-2}$   |
| Stress kinase          | Contig9735      | 2271               | Mitogen activated protein kinase 6                             | 35.06641 | 28.60465 | 58.15913 | 62.1221  | 19.75205629 | $2.64 \times 10^{-3}$   |
| Phytohormone signaling | Contig10455     | 1130               | Auxin induced-like protein                                     | 12.56245 | 9.556372 | 0.444168 | 1.189653 | 5.002390513 | $5.70 \times 10^{-3}$   |
| Phytohormone signaling | Contig17087     | 1655               | Auxin-induced protein 5NG4                                     | 5.589903 | 10.61804 | 0.594873 | 3.531612 | 11.45855049 | $3.03 \times 10^{-3}$   |
| Phytohormone signaling | Contig5460      | 1539               | Auxin induced-like protein                                     | 24.30195 | 14.86183 | 74.75834 | 113.6777 | 10.63976556 | $2.02 \times 10^{-10}$  |
| Phytohormone signaling | Contig7592      | 2980               | PIN-like auxin efflux carrier                                  | 12.70543 | 21.11348 | 6.147548 | 5.486872 | 16.88834762 | $4.72 \times 10^{-3}$   |
| Phytohormone signaling | Contig2796      | 678                | GASA5-like protein                                             | 38.11517 | 33.12332 | 0.113889 | 0.474137 | 13.42039175 | $6.94 \times 10^{-10}$  |
| Defence/stress reponse | First_Contig4   | 772                | Disease resistance associated protein                          | 203.1224 | 277.5106 | 10.17722 | 45.21784 | 260.9048067 | $5.56 \times 10^{-70}$  |
| Defence/stress reponse | Contig68841     | 366                | Senescence-associated protein                                  | 148.2983 | 77.47592 | 27.58498 | 381.4702 | 925.7755612 | $4.51 \times 10^{-7}$   |
| Defence/stress reponse | Contig30151     | 1234               | Late embryogenesis abundant protein                            | 1.656105 | 0.821571 | 58.2255  | 139.7144 | 2.201737049 | $1.45 \times 10^{-16}$  |
| Defence/stress reponse | Contig3940      | 433                | Putative CC-NBS-LRR protein                                    | 87.08625 | 160.9168 | 2.318288 | 14.37582 | 114.2078959 | $3.16 \times 10^{-45}$  |
| Defence/stress reponse | Contig11348     | 742                | Glutathione peroxidase                                         | 56.83178 | 36.20779 | 350.9099 | 117.6447 | 13.7864769  | $2.11 \times 10^{-63}$  |
| Defence/stress reponse | Contig25275     | 409                | Peroxidas e-like protein                                       | 22.45811 | 24.1117  | 48.42572 | 65.91497 | 9.451633971 | $1.00 \times 10^{-2}$   |
| Defence/stress reponse | First_Contig131 | 886                | Peroxidase                                                     | 29.66318 | 46.0133  | 2745.947 | 1828.864 | 49.90825239 | 0.00                    |
| Defence/stress reponse | Contig7174      | 700                | Peroxidase                                                     | 50.60427 | 50.84452 | 626.0631 | 226.4658 | 20.13612022 | $8.49 \times 10^{-124}$ |
| Defence/stress reponse | Contig8482      | 842                | Glutathione peroxidase                                         | 112.4304 | 52.632   | 358.8932 | 226.2611 | 32.76583034 | $3.10 \times 10^{-55}$  |

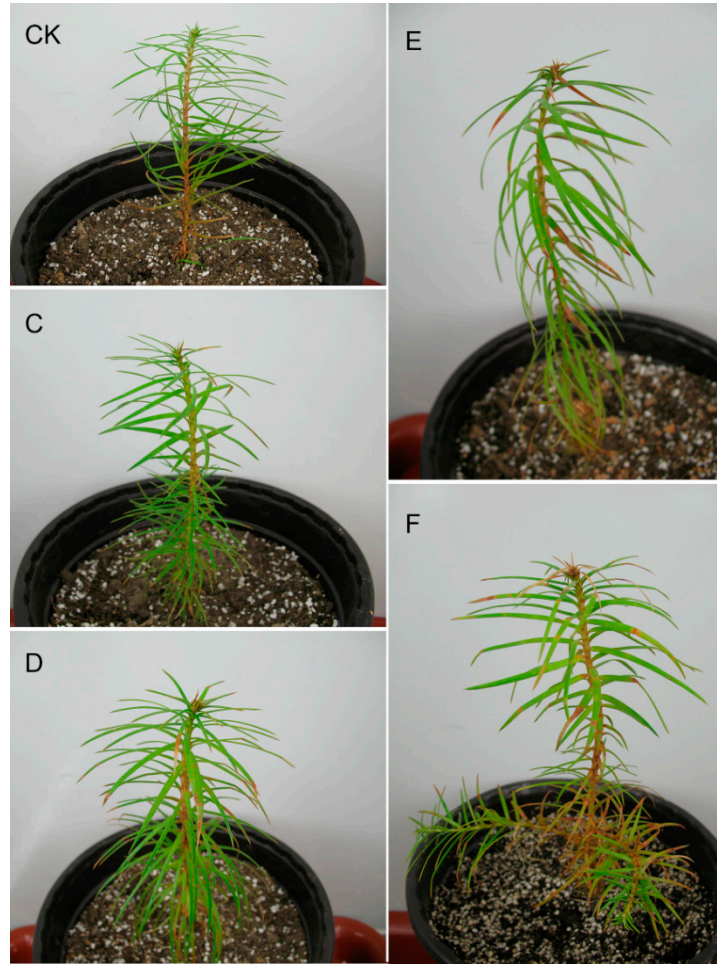

**Figure S1.** Plantlets used for the transcriptome analysis. CK control, C—5 days drought-treated, D—10 days drought-treated, E—15 days drought-treated, F—24 h post-rewatering.

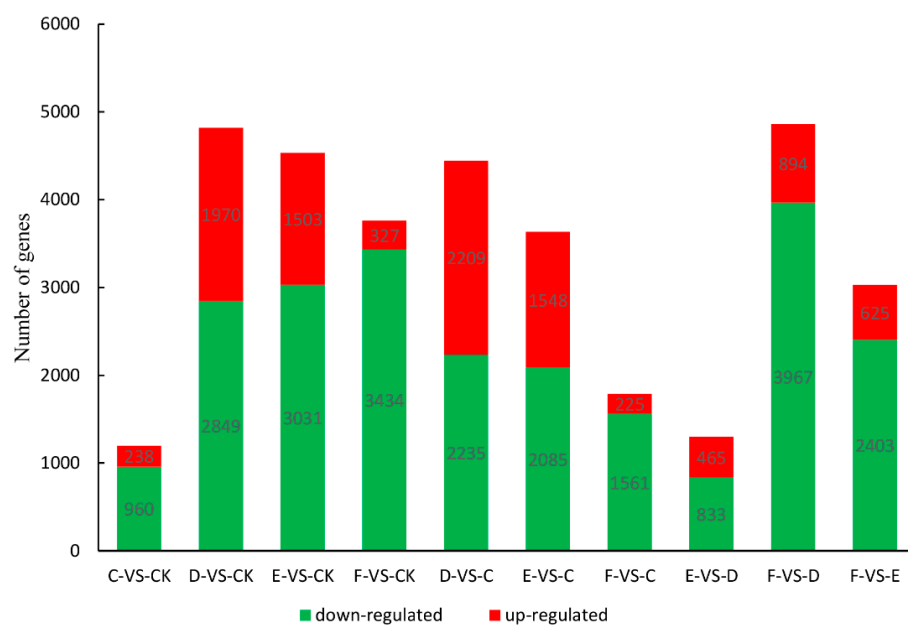

**Figure S2.** The numbers of up- and down-regulated genes between five libraries (CK, C, D, E, and F).

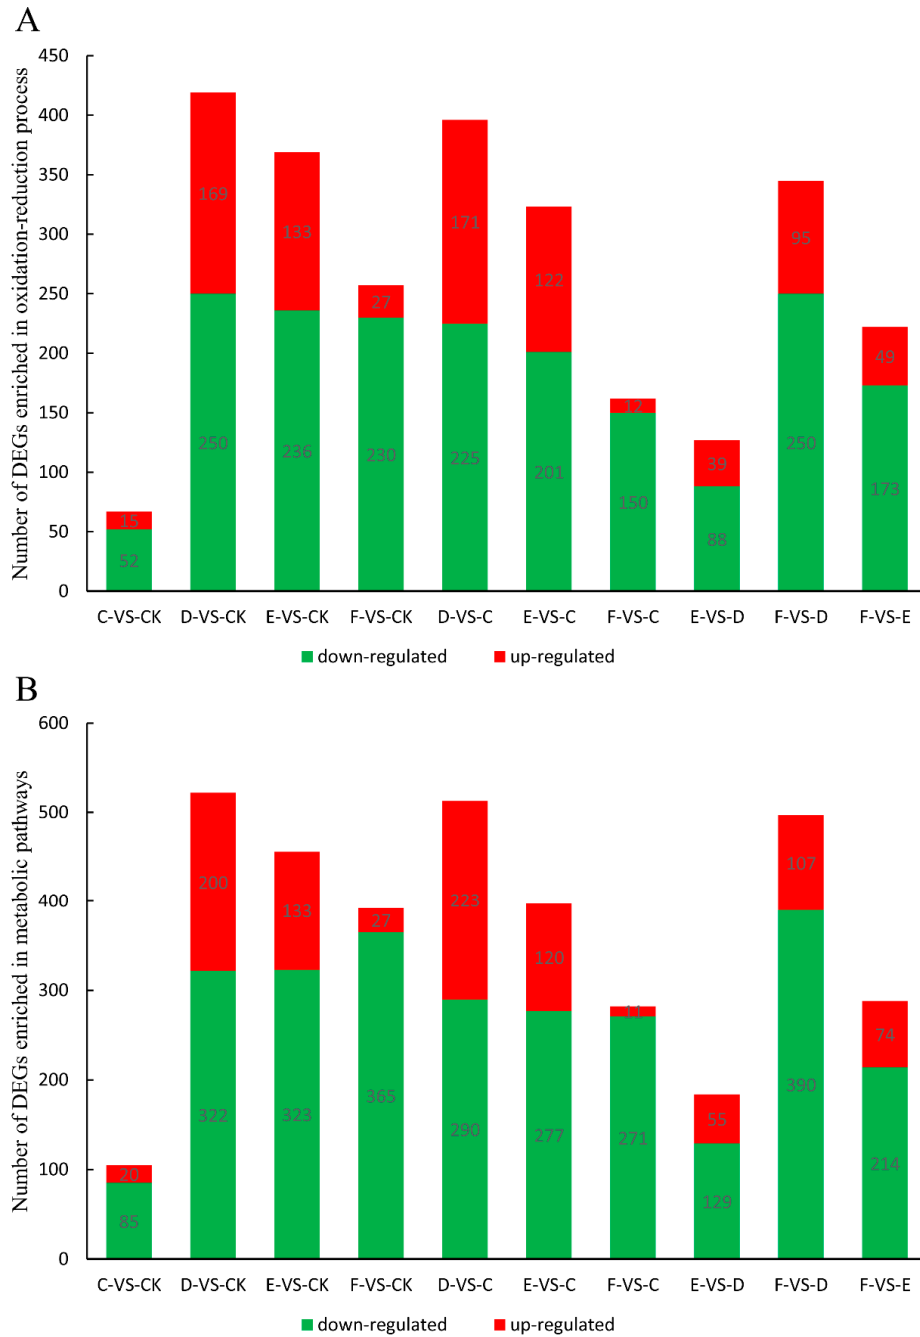

**Figure S3.** The changes of number of DEGs enriched in GO oxidation-reduction process and KEGG metabolic pathways. CK represents the control; C, D, and E represent the drought treatments; F represents re-watering. The numbers of up- and down-regulated genes among five libraries (CK, C, D, E, and F) are summarised. **(A)** Changes in DEGs enriched in GO oxidation-reduction process among the various drought-stress treatments and re-watering; **(B)** Changes in DEGs enriched in KEGG metabolic pathways among the various drought-stress treatments and re-watering.
